# Supplementary material
Source: PubMed Central journal article supplement (PMC2573920)
Supplement: pbio.0060245.sg001.pdf [file pbio.0060245.sg001.pdf]

# Supplementary Figure S1 (Hiratani et al)

**A**

| Gene name              | PCR           |     |        |     | Microarray       |       |        |     |
|------------------------|---------------|-----|--------|-----|------------------|-------|--------|-----|
|                        | Mean %early S |     | E or L |     | Log2(Early/Late) |       | E or L |     |
|                        | ESC           | NPC | ESC    | NPC | ESC              | NPC   | ESC    | NPC |
| <i>Rex1/Zfp42</i>      | 74%           | 23% | E      | L   | 0.88             | -0.94 | E      | L   |
| <i>Rex2</i>            | 65%           | 35% | E      | L   | 1.22             | -1.67 | E      | L   |
| <i>Dppa2</i>           | 71%           | 24% | E      | L   | 1.16             | -1.30 | E      | L   |
| <i>Dppa4</i>           | 68%           | 25% | E      | L   | 1.17             | -1.45 | E      | L   |
| <i>Crisp1</i>          | 46%           | 29% | L      | L   | -0.76            | -1.25 | L      | L   |
| <i>Trap1a</i>          | 52%           | 40% | E      | L   | 0.18             | -0.72 | E      | L   |
| <i>Ephb1</i>           | 47%           | 67% | L      | E   | -1.32            | 0.64  | L      | E   |
| <i>Akt3</i>            | 40%           | 61% | L      | E   | -0.97            | 0.30  | L      | E   |
| <i>Ptn</i>             | 38%           | 62% | L      | E   | -0.91            | 0.79  | L      | E   |
| <i>Cdh2</i>            | 33%           | 47% | L      | L   | -1.23            | -0.45 | L      | L   |
| <i>Postn</i>           | 32%           | 47% | L      | L   | -1.36            | -0.45 | L      | L   |
| <i>Mash1/Ascl1</i>     | 30%           | 47% | L      | L   | -1.03            | 0.05  | L      | E   |
| <i>Nanog</i>           | 80%           | 65% | E      | E   | 0.62             | 1.09  | E      | E   |
| <i>Fgf4</i>            | 80%           | 69% | E      | E   | 1.00             | 0.91  | E      | E   |
| <i>Oct-4/Pou5f1</i>    | 76%           | 78% | E      | E   | 0.73             | 1.14  | E      | E   |
| <i>Mmp15</i>           | 84%           | 80% | E      | E   | 1.16             | 0.88  | E      | E   |
| <i>α-globin/Hba-a1</i> | 73%           | 79% | E      | E   | 1.32             | 1.20  | E      | E   |
| <i>β-globin/Hbb-b1</i> | 21%           | 20% | L      | L   | -0.84            | -1.10 | L      | L   |

Matched: 18/18 (100%) 17/18 (94%)

**B**

| Gene name              | PCR (Hiratani et al, 46CEESC) |           | Microarray (D3ESC) |           |
|------------------------|-------------------------------|-----------|--------------------|-----------|
|                        | E or L                        | Log2(E/L) | E or L             | Log2(E/L) |
| <i>Lefty2</i>          | E                             | 0.85      | E                  | 0.85      |
| <i>Dmrt1</i>           | E                             | 0.66      | E                  | 0.66      |
| <i>Tdgf1/Cripto</i>    | E                             | 0.99      | E                  | 0.99      |
| <i>Tcfap2c</i>         | E                             | 1.07      | E                  | 1.07      |
| <i>2010004A03Rik</i>   | E                             | 1.02      | E                  | 1.02      |
| <i>Utf1</i>            | E                             | 0.84      | E                  | 0.84      |
| <i>Ptgis</i>           | E                             | 1.10      | E                  | 1.10      |
| <i>Epha2</i>           | E                             | 0.53      | E                  | 0.53      |
| <i>Pcolce</i>          | E                             | 0.64      | E                  | 0.64      |
| <i>Ltbr</i>            | E                             | 1.36      | E                  | 1.36      |
| <i>Ddr1</i>            | E                             | 1.06      | E                  | 1.06      |
| <i>Dll1</i>            | E                             | 1.52      | E                  | 1.52      |
| <i>Mmp15</i>           | E                             | 1.16      | E                  | 1.16      |
| <i>Slc25a10</i>        | E                             | 0.68      | E                  | 0.68      |
| <i>Nfatc1</i>          | E                             | 0.71      | E                  | 0.71      |
| <i>Bmp1</i>            | E                             | 1.26      | E                  | 1.26      |
| <i>Fgfr1</i>           | E                             | 1.21      | E                  | 1.21      |
| <i>Gpr56</i>           | E                             | 1.39      | E                  | 1.39      |
| <i>Rex1/Zfp42</i>      | E                             | 0.88      | E                  | 0.88      |
| <i>Rex2</i>            | E                             | 1.22      | E                  | 1.22      |
| <i>Spp1</i>            | E                             | 0.73      | E                  | 0.73      |
| <i>1700034H14Rik</i>   | E                             | 1.14      | E                  | 1.14      |
| <i>Ctgf</i>            | E                             | 1.28      | E                  | 1.28      |
| <i>Ddx4</i>            | E                             | 1.60      | E                  | 1.60      |
| <i>Rbpms</i>           | E                             | 1.33      | E                  | 1.33      |
| <i>Tfpi</i>            | E                             | 1.53      | E                  | 1.53      |
| <i>Terf1</i>           | E                             | 1.18      | E                  | 1.18      |
| <i>Ptn</i>             | L                             | -0.91     | L                  | -0.91     |
| <i>Tspan12/Tm4sf12</i> | L                             | -1.34     | L                  | -1.34     |
| <i>Postn</i>           | L                             | -1.36     | L                  | -1.36     |
| <i>Lox</i>             | L                             | -0.82     | L                  | -0.82     |
| <i>Mtap2</i>           | E                             | -1.15     | L                  | -1.15     |
| <i>Sox6</i>            | E                             | -1.17     | L                  | -1.17     |
| <i>Ptgs2</i>           | L                             | -1.12     | L                  | -1.12     |
| <i>Crisp1</i>          | E                             | -0.76     | L                  | -0.76     |
| <i>Adcy8</i>           | L                             | -1.29     | L                  | -1.29     |
| <i>Car8</i>            | L                             | -1.08     | L                  | -1.08     |
| <i>Spr2a</i>           | L                             | -1.10     | L                  | -1.10     |
| <i>A2m</i>             | L                             | -1.00     | L                  | -1.00     |
| <i>Mme</i>             | E                             | -0.61     | L                  | -0.61     |
| <i>Cdh4</i>            | E                             | 0.41      | E                  | 0.41      |
| <i>Lmo1</i>            | E                             | -0.15     | L                  | -0.15     |
| <i>Trap1a</i>          | E                             | 0.18      | E                  | 0.18      |
| <i>Gbp3</i>            | E                             | 0.10      | E                  | 0.10      |
| <i>Nr0b1</i>           | L                             | -0.25     | L                  | -0.25     |
| <i>Egfr</i>            | E                             | -0.36     | L                  | -0.36     |
| <i>Col1a2</i>          | E                             | 0.24      | E                  | 0.24      |

41/47 Matched (87%)

**C**

| Gene name                 | PCR (Perry et al, OS25ESC) |           | Microarray (D3ESC) |           |
|---------------------------|----------------------------|-----------|--------------------|-----------|
|                           | E or L                     | Log2(E/L) | E or L             | Log2(E/L) |
| <i>Sc1/Tal1</i>           | E                          | 0.93      | E                  | 0.93      |
| <i>Lmo2</i>               | E                          | 1.18      | E                  | 1.18      |
| <i>Gata1</i>              | E                          | 0.37      | E                  | 0.37      |
| <i>Gata2</i>              | E                          | 1.23      | E                  | 1.23      |
| <i>Gata3</i>              | E                          | 0.95      | E                  | 0.95      |
| <i>T-bet/Tbx21</i>        | E                          | 1.04      | E                  | 1.04      |
| <i>Ebf1</i>               | L                          | 0.47      | E                  | 0.47      |
| <i>Pax5</i>               | E                          | 1.10      | E                  | 1.10      |
| <i>Ikaros/Ikzf1</i>       | E                          | 1.19      | E                  | 1.19      |
| <i>NF-E2/Nfe2</i>         | E                          | 1.00      | E                  | 1.00      |
| <i>C/EBPalpha (Cebpa)</i> | E                          | 1.29      | E                  | 1.29      |
| <i>PU.1/Sfpi1</i>         | E                          | 1.21      | E                  | 1.21      |
| <i>Myb/c-myb</i>          | E                          | 1.23      | E                  | 1.23      |
| <i>Myog</i>               | E                          | 1.30      | E                  | 1.30      |
| <i>Myod1/Myod</i>         | E                          | 0.93      | E                  | 0.93      |
| <i>Myf5</i>               | E                          | -1.34     | L                  | -1.34     |
| <i>Sox1</i>               | E                          | 1.38      | E                  | 1.38      |
| <i>Sox2</i>               | E                          | 0.94      | E                  | 0.94      |
| <i>Sox3</i>               | L                          | -0.58     | L                  | -0.58     |
| <i>Irx3</i>               | E                          | 0.50      | E                  | 0.50      |
| <i>Nkx2-2</i>             | E                          | 0.98      | E                  | 0.98      |
| <i>Nkx2-9</i>             | E                          | 0.00      | E                  | 0.00      |
| <i>Msx1</i>               | E                          | 0.25      | E                  | 0.25      |
| <i>Pax3</i>               | E                          | 0.44      | E                  | 0.44      |
| <i>Pax6</i>               | E                          | 0.71      | E                  | 0.71      |
| <i>Pax7</i>               | E                          | 0.85      | E                  | 0.85      |
| <i>Olig2</i>              | E                          | 0.93      | E                  | 0.93      |
| <i>Neurod/Neurod1</i>     | L                          | -0.71     | L                  | -0.71     |
| <i>Mash1/Ascl1</i>        | L                          | -1.03     | L                  | -1.03     |
| <i>Math1/Atoh1</i>        | E                          | 1.14      | E                  | 1.14      |
| <i>Neurog1/Ngn1</i>       | E                          | 0.97      | E                  | 0.97      |
| <i>Neurog2/Ngn2</i>       | E                          | 0.68      | E                  | 0.68      |
| <i>Hes1</i>               | E                          | 1.23      | E                  | 1.23      |
| <i>Hes5</i>               | E                          | 0.88      | E                  | 0.88      |
| <i>Oct-4/Pou5f1</i>       | E                          | 0.73      | E                  | 0.73      |
| <i>Nanog</i>              | E                          | 0.62      | E                  | 0.62      |
| <i>Utf1</i>               | E                          | 0.84      | E                  | 0.84      |
| <i>Rex1/Zfp42</i>         | E                          | 0.88      | E                  | 0.88      |
| <i>Foxd3</i>              | E                          | 0.85      | E                  | 0.85      |
| <i>Dppa5/Esg1</i>         | E                          | 0.93      | E                  | 0.93      |
| <i>Tdgf1/Cripto</i>       | E                          | 0.99      | E                  | 0.99      |
| <i>Fgf4</i>               | E                          | 1.00      | E                  | 1.00      |
| <i>Zfp57</i>              | E                          | 0.62      | E                  | 0.62      |

41/43 Matched (95%)
