# Supplementary material
Source: PubMed Central journal article supplement (PMC2573920)

# Supplementary Figure S2 (Hiratani et al)

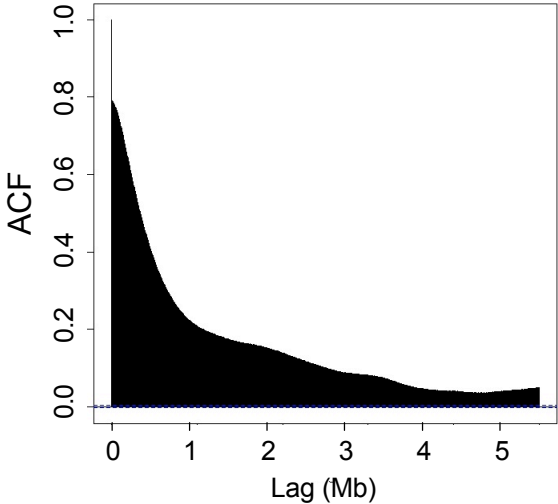

Supplement: pbio.0060245.sg002.pdf [file pbio.0060245.sg002.pdf]

# Supplementary Figure S3 (Hiratani et al)

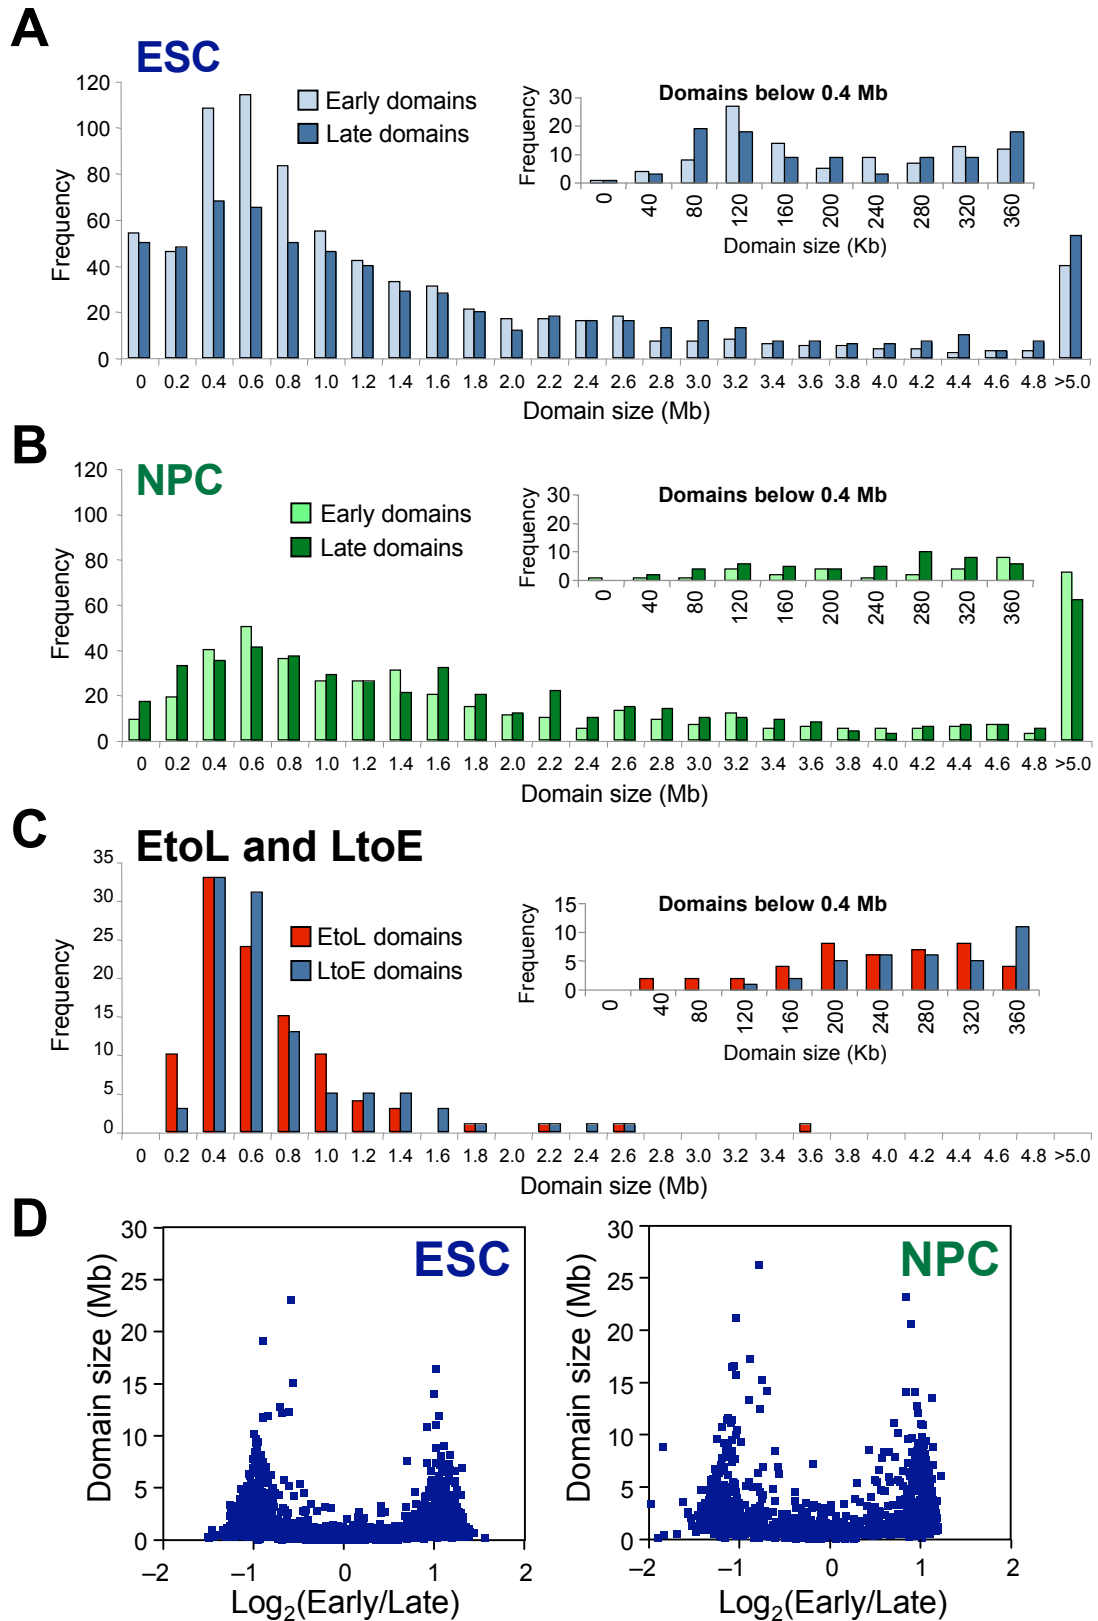

Supplement: pbio.0060245.sg003.pdf [file pbio.0060245.sg003.pdf]
